# Supplementary material
Source: PubMed Central journal article supplement (PMC3514006)

**SUPPLEMENTARY FIG. S5. Synthetic TP upregulate protein levels of Nrf2/ARE genes in the ventral mid-brain.** Western blot analysis (A) and densitometry analysis (B) showing relative changes of Nrf2 and downstream ARE proteins in ventral midbrain after TP-319 and TP-500 administration. Bars represent mean  $\pm$  SEM. \* $p < 0.05$  compared to controls ( $n = 5$ /time point).

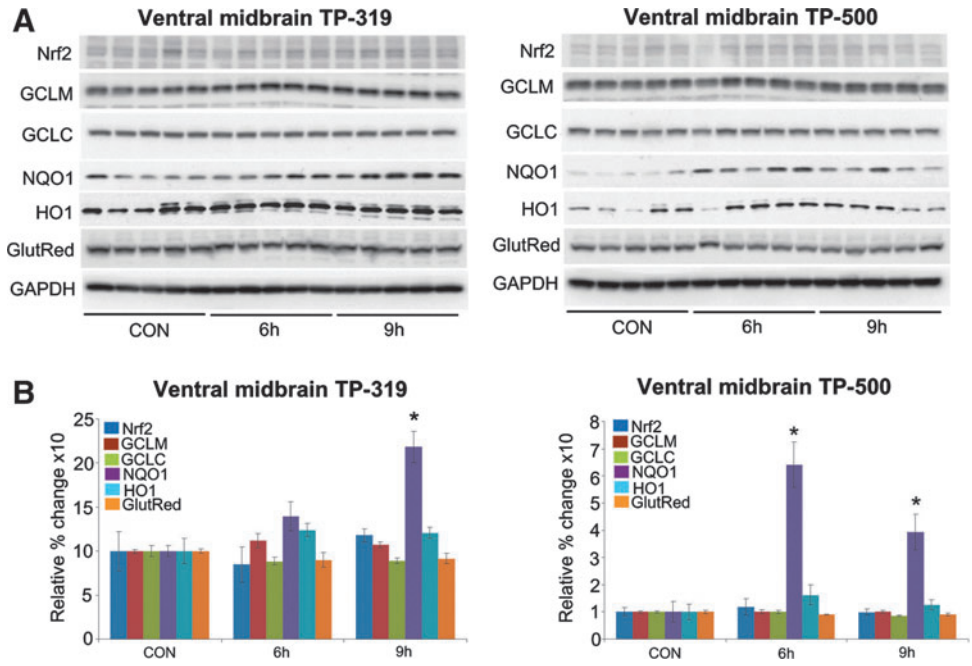

Supplement: Supp_Fig5.pdf [file Supp_Fig5.pdf]
