# Supplementary material
Source: PubMed Central journal article supplement (PMC3514006)
Supplement: Supp_Fig7.pdf [file Supp_Fig7.pdf]

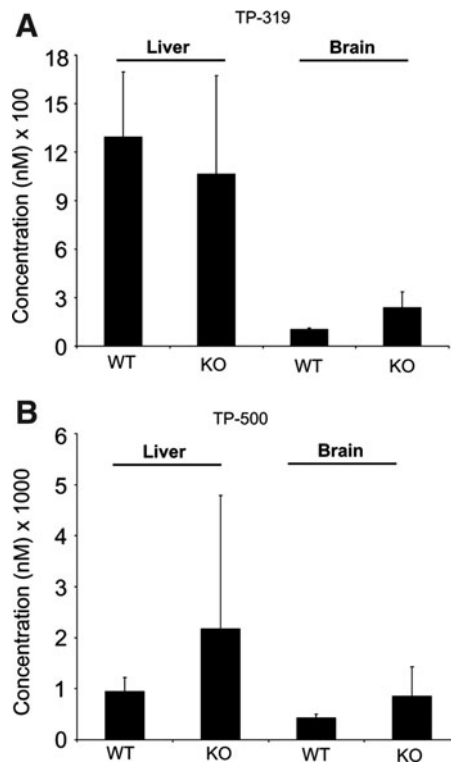

**SUPPLEMENTARY FIG. S7. Relative levels of synthetic TP *in vivo*.** (A) Levels of TP-319 and (B) levels of TP-500 in the liver and brain of WT and Nrf2 KO mice following two doses of 4  $\mu$ mol of TP-319 administered 12 h apart by oral gavage and measured 9 h after the last dose. Bars represent mean  $\pm$  SDEV ( $n=5$  mice per group for each time point).
